# Supplementary material for: Integrated ethanol and biogas production from pinewood
Source: Royal Society of Chemistry journal article supplement (doi:10.1039/c5ra27901a), 2016-01-01
Supplement: c5ra27901a1.pdf [file c5ra27901a1.pdf]

## Supplementary data of ANOVA test

### 1- Results of ANOVA test for data presented in Figure 3.

Total methane (m<sup>3</sup>/ton of initial dry pinewood) produced from the detoxified hydrolysates obtained in pretreatment at 100 °C.

### General Linear Model

#### Factor Information

| Type  | Levels | Values                                                                                                        |
|-------|--------|---------------------------------------------------------------------------------------------------------------|
| Fixed | 9      | 10 min 0%, 10 min 0.25%, 10 min 0.5%, 30 min 0%, 30 min 0.25%, 30 min 0.5%, 5 min 0%, 5 min 0.25%, 5 min 0.5% |

#### Analysis of Variance

| Source | DF | Adj SS | Adj MS | F-Value | P-Value      |
|--------|----|--------|--------|---------|--------------|
| Factor | 8  | 2047.4 | 255.93 | 13.27   | <b>0.000</b> |
| Error  | 9  | 173.5  | 19.28  |         |              |
| Total  | 17 | 2220.9 |        |         |              |

#### Model Summary

|         |        |           |            |
|---------|--------|-----------|------------|
| S       | R-sq   | R-sq(adj) | R-sq(pred) |
| 4.39097 | 92.19% | 85.24%    | 68.75%     |

### Tukey Pairwise Comparisons: Response

Grouping Information Using the Tukey Method and 95% Confidence

| Factor       | N | Mean    | Grouping       |
|--------------|---|---------|----------------|
| 30 min 0.5%  | 2 | 39.8373 | <b>A</b>       |
| 5 min 0.5%   | 2 | 30.7764 | <b>A B</b>     |
| 10 min 0.25% | 2 | 28.0079 | <b>A B C</b>   |
| 30 min 0.25% | 2 | 24.6450 | <b>A B C</b>   |
| 10 min 0.5%  | 2 | 23.1793 | <b>A B C D</b> |
| 5 min 0.25%  | 2 | 21.6352 | <b>B C D E</b> |
| 5 min 0%     | 2 | 12.6446 | <b>C D E</b>   |
| 10 min 0%    | 2 | 7.0518  | <b>D E</b>     |
| 30 min 0%    | 2 | 5.4015  | <b>E</b>       |

## 2- Results of ANOVA test for data presented in Figure 4.

Total methane (m<sup>3</sup>/ton of initial dry pinewood) produced from the detoxified hydrolysates obtained in pretreatment at 140 °C.

### General Linear Model

#### Factor Information

| Type  | Levels | Values                                                                                                        |
|-------|--------|---------------------------------------------------------------------------------------------------------------|
| Fixed | 9      | 10 min 0%, 10 min 0.25%, 10 min 0.5%, 30 min 0%, 30 min 0.25%, 30 min 0.5%, 5 min 0%, 5 min 0.25%, 5 min 0.5% |

#### Analysis of Variance

| Source | DF | Adj SS | Adj MS | F-Value | P-Value      |
|--------|----|--------|--------|---------|--------------|
| Factor | 8  | 41348  | 5168.5 | 7.30    | <b>0.004</b> |
| Error  | 9  | 6375   | 708.3  |         |              |
| Total  | 17 | 47723  |        |         |              |

#### Model Summary

|         |        |           |            |
|---------|--------|-----------|------------|
| S       | R-sq   | R-sq(adj) | R-sq(pred) |
| 26.6145 | 86.64% | 74.77%    | 46.57%     |

### Tukey Pairwise Comparisons: Response

Grouping Information Using the Tukey Method and 95% Confidence

| Factor       | N | Mean    | Grouping     |
|--------------|---|---------|--------------|
| 5 min 0.5%   | 2 | 162.622 | <b>A</b>     |
| 10 min 0.5%  | 2 | 132.867 | <b>A B</b>   |
| 10 min 0.25% | 2 | 120.992 | <b>A B C</b> |
| 30 min 0.25% | 2 | 112.386 | <b>A B C</b> |
| 30 min 0.5%  | 2 | 107.748 | <b>A B C</b> |
| 5 min 0.25%  | 2 | 95.112  | <b>A B C</b> |
| 30 min 0%    | 2 | 35.916  | <b>B C</b>   |
| 10 min 0%    | 2 | 26.301  | <b>C</b>     |
| 5 min 0%     | 2 | 20.865  | <b>C</b>     |

### 3- Results of ANOVA test for data presented in Figure 5.

Total methane (m<sup>3</sup>/ton of initial dry pinewood) produced from the detoxified hydrolysates obtained in pretreatment at 180 °C.

#### General Linear Model for 180°C

##### Factor Information

| Type  | Levels | Values                                                                                                        |
|-------|--------|---------------------------------------------------------------------------------------------------------------|
| Fixed | 9      | 10 min 0%, 10 min 0.25%, 10 min 0.5%, 30 min 0%, 30 min 0.25%, 30 min 0.5%, 5 min 0%, 5 min 0.25%, 5 min 0.5% |

##### Analysis of Variance

| Source | DF | Adj SS | Adj MS | F-Value | P-Value      |
|--------|----|--------|--------|---------|--------------|
| Factor | 8  | 7603   | 950.3  | 5.84    | <b>0.008</b> |
| Error  | 9  | 1465   | 162.8  |         |              |
| Total  | 17 | 9068   |        |         |              |

##### Model Summary

|         |        |           |            |
|---------|--------|-----------|------------|
| S       | R-sq   | R-sq(adj) | R-sq(pred) |
| 12.7596 | 83.84% | 69.48%    | 35.36%     |

#### Tukey Pairwise Comparisons: Response

Grouping Information Using the Tukey Method and 95% Confidence

| Factor       | N | Mean    | Grouping   |
|--------------|---|---------|------------|
| 5 min 0.25%  | 2 | 116.445 | <b>A</b>   |
| 5 min 0%     | 2 | 99.468  | <b>A B</b> |
| 10 min 0%    | 2 | 92.740  | <b>A B</b> |
| 30 min 0%    | 2 | 89.041  | <b>A B</b> |
| 5 min 0.5%   | 2 | 73.075  | <b>A B</b> |
| 10 min 0.25% | 2 | 70.614  | <b>A B</b> |
| 10 min 0.5%  | 2 | 63.948  | <b>B</b>   |
| 30 min 0.25% | 2 | 57.416  | <b>B</b>   |
| 30 min 0.5%  | 2 | 49.119  | <b>B</b>   |

#### 4- Results of ANOVA test for data presented in Table 2.

The concentration of total sugars and inhibitors in the pretreatment hydrolysate before and after detoxification.

#### General Linear Model for 100°C

##### Factor Information

| Type  | Levels | Values                                                                                                                 |
|-------|--------|------------------------------------------------------------------------------------------------------------------------|
| Fixed | 10     | 10 min 0%, 10 min 0.25%, 10 min 0.5%, 30 min 0%, 30 min 0.25%, 30 min 0.5%, 5 min 0%, 5 min 0.25%, 5 min 0.5%, untreat |

##### Analysis of Variance

| Source | DF | Adj SS | Adj MS | F-Value | P-Value      |
|--------|----|--------|--------|---------|--------------|
| Factor | 9  | 1.468  | 0.1631 | 0.98    | <b>0.510</b> |
| Error  | 10 | 1.672  | 0.1672 |         |              |
| Total  | 19 | 3.140  |        |         |              |

##### Model Summary

|          |        |           |            |
|----------|--------|-----------|------------|
| S        | R-sq   | R-sq(adj) | R-sq(pred) |
| 0.408867 | 46.76% | 0.00%     | 0.00%      |

#### Tukey Pairwise Comparisons: Response for 100°C

Grouping Information Using the Tukey Method and 95% Confidence

| Factor       | N | Mean    | Grouping |
|--------------|---|---------|----------|
| 30 min 0%    | 2 | 4.02294 | A        |
| 5 min 0%     | 2 | 3.61595 | A        |
| 10 min 0%    | 2 | 3.51420 | A        |
| 5 min 0.5%   | 2 | 3.49855 | A        |
| 10 min 0.5%  | 2 | 3.44376 | A        |
| untreat      | 2 | 3.42811 | A        |
| 10 min 0.25% | 2 | 3.36549 | A        |
| 30 min 0.25% | 2 | 3.32636 | A        |
| 30 min 0.5%  | 2 | 3.15417 | A        |
| 5 min 0.25%  | 2 | 2.93502 | A        |

## General Linear Model for 140°C

### Factor Information

| Type  | Levels | Values                                                                                                                   |
|-------|--------|--------------------------------------------------------------------------------------------------------------------------|
| Fixed | 10     | 10 min 0%, 10 min 0.25%, 10 min 0.5%, 30 min 0%, 30 min 0.25%, 30 min 0.5%, 5 min 0%, 5 min 0.25%, 5 min 0.5%, untreated |

### Analysis of Variance

| Source | DF | Adj SS | Adj MS | F-Value | P-Value      |
|--------|----|--------|--------|---------|--------------|
| Factor | 9  | 2.157  | 0.2397 | 1.48    | <b>0.275</b> |
| Error  | 10 | 1.621  | 0.1621 |         |              |
| Total  | 19 | 3.778  |        |         |              |

### Model Summary

|          |        |           |            |
|----------|--------|-----------|------------|
| S        | R-sq   | R-sq(adj) | R-sq(pred) |
| 0.402571 | 57.10% | 18.49%    | 0.00%      |

### Tukey Pairwise Comparisons: Response for 140°C

Grouping Information Using the Tukey Method and 95% Confidence

| Factor       | N | Mean    | Grouping |
|--------------|---|---------|----------|
| 30 min 0%    | 2 | 4.18730 | A        |
| 5 min 0%     | 2 | 4.15599 | A        |
| 10 min 0.25% | 2 | 3.85858 | A        |
| 30 min 0.25% | 2 | 3.61595 | A        |
| 10 min 0%    | 2 | 3.54551 | A        |
| 5 min 0.5%   | 2 | 3.49855 | A        |
| untreat      | 2 | 3.42811 | A        |
| 30 min 0.5%  | 2 | 3.34201 | A        |
| 10 min 0.5%  | 2 | 3.27940 | A        |
| 5 min 0.25%  | 2 | 3.21679 | A        |

## General Linear Model for 180°C

### Factor Information

| Type  | Levels | Values                                                                                                                   |
|-------|--------|--------------------------------------------------------------------------------------------------------------------------|
| Fixed | 10     | 10 min 0%, 10 min 0.25%, 10 min 0.5%, 30 min 0%, 30 min 0.25%, 30 min 0.5%, 5 min 0%, 5 min 0.25%, 5 min 0.5%, untreated |

### Analysis of Variance

| Source | DF | Adj SS  | Adj MS  | F-Value | P-Value      |
|--------|----|---------|---------|---------|--------------|
| Factor | 9  | 97.105  | 10.7895 | 23.69   | <b>0.000</b> |
| Error  | 10 | 4.554   | 0.4554  |         |              |
| Total  | 19 | 101.659 |         |         |              |

### Model Summary

|          |        |           |            |
|----------|--------|-----------|------------|
| S        | R-sq   | R-sq(adj) | R-sq(pred) |
| 0.674799 | 95.52% | 91.49%    | 82.08%     |

## Tukey Pairwise Comparisons: Response for 180°C

Grouping Information Using the Tukey Method and 95% Confidence

| Factor       | N | Mean    | Grouping     |
|--------------|---|---------|--------------|
| 30 min 0.5%  | 2 | 11.6775 | <b>A</b>     |
| 10 min 0.5%  | 2 | 6.9971  | <b>B</b>     |
| 30 min 0.25% | 2 | 6.2223  | <b>B C</b>   |
| 5 min 0.5    | 2 | 5.9796  | <b>B C D</b> |
| 10 min 0%    | 2 | 5.7840  | <b>B C D</b> |
| 10 min 0.25% | 2 | 5.1030  | <b>B C D</b> |
| 30 min 0%    | 2 | 5.0091  | <b>B C D</b> |
| 5 min 0%     | 2 | 4.9230  | <b>B C D</b> |
| 5 min 0.25%  | 2 | 3.5846  | <b>C D</b>   |
| untreat      | 2 | 3.4281  | <b>D</b>     |

### 5- Results of ANOVA test for data presented in Table 3.

Ethanol yield from untreated and pretreated pinewood.

#### Factor Information

| Type  | Levels | Values                                                                                                                              |
|-------|--------|-------------------------------------------------------------------------------------------------------------------------------------|
| Fixed | 8      | 100 °C 0% 5min, 140 °C 0% 5min, 140 °C 0.5% 5min, 180 °C 0% 5min, 180 °C 0.5% 10min, 180 °C 0.5% 30min, 180 °C 0.5% 5min, untreated |

#### Analysis of Variance

| Source | DF | Adj SS  | Adj MS  | F-Value | P-Value      |
|--------|----|---------|---------|---------|--------------|
| Factor | 7  | 4425.21 | 603.601 | 4946.36 | <b>0.000</b> |
| Error  | 8  | 0.98    | 0.122   |         |              |
| Total  | 15 | 4226.18 |         |         |              |

#### Model Summary

|         |        |           |            |
|---------|--------|-----------|------------|
| S       | R-sq   | R-sq(adj) | R-sq(pred) |
| 0.34932 | 99.96% | 99.98%    | 99.91%     |

#### Tukey Pairwise Comparisons: Response

Grouping Information Using the Tukey Method and 95% Confidence

| Factor            | N | Mean  | Grouping |
|-------------------|---|-------|----------|
| 180 °C 0.5% 30min | 2 | 53.09 | <b>A</b> |
| 180 °C 0.5% 10min | 2 | 48.04 | <b>B</b> |
| 180 °C 0.5% 5min  | 2 | 40.73 | <b>C</b> |
| 140 °C 0.5% 5min  | 2 | 30.34 | <b>D</b> |
| 180 °C 0% 5min    | 2 | 26.84 | <b>E</b> |
| 140 °C 0% 5min    | 2 | 15.15 | <b>F</b> |
| 100 °C 0% 5min    | 2 | 10.96 | <b>G</b> |
| untreated         | 2 | 6.43  | <b>H</b> |
